# Supplementary material for: A Survey-Based Study on Physical Activity Promotion for Individuals with a Current or Past Diagnosis of Cancer in Canada
Source: MDPI journal article supplement (doi:10.3390/curroncol29120770), 2022-12-13
Supplement: s1 [file s1]

## Exercise Prompt / Physical Activity Survey - 1

Date: \_\_\_\_\_

***Please answer these questions about yourself:***

1. What is your month and year of birth? \_\_\_\_\_
2. Are you male or female? \_\_\_\_\_
3. What type of cancer have you been diagnosed with? \_\_\_\_\_
4. What stage of cancer have you been diagnosed with? \_\_\_\_\_
5. Was this your first appointment or a follow up appointment?
  - ☐ First appointment
  - ☐ Follow-up appointment

6. Are you currently undergoing treatment? ☐ Yes ☐ No

- ☐ **If YES**, please describe the type of treatment you are currently receiving (check all that apply):

- ☐ **Chemotherapy**
- ☐ **Radiation**
- ☐ **Hormonal Therapy**
- ☐ **Other (please describe):** \_\_\_\_\_  
\_\_\_\_\_  
\_\_\_\_\_

***Please answer the following questions regarding your interaction with your oncology care provider today.***

7. Did you discuss physical activity or exercise with your oncology care provider at today's appointment?:
  - ☐ Yes
  - ☐ No
8. If **YES** to question #7, who was this discussion with? (check all that apply)
  - ☐ Medical Oncologist
  - ☐ Radiation Oncologist
  - ☐ Oncology Nurse
  - ☐ Other (please list): \_\_\_\_\_

9. If **YES** to question #7, what did the discussion include?

- |                                                                                       |                              |                             |
|---------------------------------------------------------------------------------------|------------------------------|-----------------------------|
| • Did they discuss your current exercise level?                                       | <input type="checkbox"/> Yes | <input type="checkbox"/> No |
| • Did they discuss the benefits of exercise for cancer survivors?                     | <input type="checkbox"/> Yes | <input type="checkbox"/> No |
| • Did they discuss how you can become more active?                                    | <input type="checkbox"/> Yes | <input type="checkbox"/> No |
| • Did they discuss what types of exercise you can do?                                 | <input type="checkbox"/> Yes | <input type="checkbox"/> No |
| • Did they discuss how often you should exercise or how long you should exercise for? | <input type="checkbox"/> Yes | <input type="checkbox"/> No |

What else did you discuss (**related to exercise or physical activity**)?

---

---

---

---

10. If **NO** to question #7, have you discussed physical activity or exercise with your oncology care provider in the past?

- ☐ Yes  
☐ No  
☐ Not applicable

11. If **NO** to question #7, would you have liked to discuss this topic (exercise / physical activity) with your health care team today?

- ☐ Yes  
☐ No

12. If **YES** to question #11, what would you have liked to discuss?

---

---

---

---

13. Please rank your satisfaction with the education you have been provided on physical activity / exercise throughout your cancer treatment (please circle):

Extremely  
Dissatisfied

Moderately  
Dissatisfied

Slightly  
Dissatisfied

Neutral

Slightly  
Satisfied

Moderately  
Satisfied

Extremely  
Satisfied

***Please answer the following questions about your physical activity level:***

During a typical week, how many times (on average) do you participate in 15-minutes or more of strenuous exercise (heart beats rapidly). *Examples include running, jogging, hockey, football, soccer, squash, basketball, cross country skiing, vigorous swimming, long distance bicycling.*

\_\_\_\_\_ Times

During a typical week, how many times (on average) do you participate in 15-minutes or more of moderate exercise (not exhausting exercise). *Examples include fast walking, baseball, tennis, easy bicycling, volleyball, badminton, easy swimming, alpine skiing, dancing.*

\_\_\_\_\_ Times

During a typical week, how many times (on average) do you participate in 15-minutes or more of mild exercise (minimal effort). *Examples include yoga, bowling, golf, easy walking.*

\_\_\_\_\_ Times

During a typical week, in your leisure time, how often do you engage in any regular activity long enough to work up a sweat (heart beats rapidly)?

- ☐ Often
- ☐ Sometimes
- ☐ Never

*Thank you for completing this survey!*
